# Supplementary material for: O Prognóstico da Doença Arterial Coronariana em um Hospital Público no Brasil: Achado do Estudo ERICO
Source: PubMed Central journal article supplement (PMC8682093; doi:10.36660/abc.20200399), 2021-09-16
Supplement: 2020-0399_material_suplementar.pdf [file 2020-0399_material_suplementar.pdf]

**Supplemental table 1. Pharmacological treatment in the study sample (n=800) from the ERICO cohort according to coronary obstruction**

| Pharmacological treatment (%)     | No obstruction | 1 vessel-disease | 2-vessel-disease | Multivessel-disease | P-value |
|-----------------------------------|----------------|------------------|------------------|---------------------|---------|
| <b>Hospital admission for ACS</b> |                |                  |                  |                     |         |
| Aspirin                           | 30 (29.7)      | 85 (29.7)        | 61 (37.9)        | 69 (33.0)           | 0.32    |
| Clopidogrel                       | 1 (1.0)        | 8 (2.8)          | 10 (6.2)         | 5 (2.5)             | 0.07    |
| <sup>2</sup> blocker              | 33 (32.7)      | 72 (25.2)        | 60 (37.3)        | 59 (28.1)           | 0.048   |
| Calcium blocker                   | 9 (9.0)        | 24 (8.4)         | 19 (11.8)        | 32 (15.2)           | 0.10    |
| ACE inhibitor                     | 39 (38.6)      | 118 (41.3)       | 69 (43.0)        | 80 (38.1)           | 0.78    |
| ARB                               | 6 (5.9)        | 15 (5.2)         | 11 (6.8)         | 11 (5.2)            | 0.90    |
| Warfarin                          | 1 (1.0)        | 4 (1.4)          | 1 (0.6)          | 7 (3.3)             | 0.20    |
| Lipid lowering drugs              | 21 (20.8)      | 64 (22.4)        | 43 (26.7)        | 55 (26.2)           | 0.54    |
| Fibrate                           | 3 (3.0)        | 4 (1.4)          | 3 (1.9)          | 2 (1.0)             | 0.59    |
| <b>30 days after ACS</b>          |                |                  |                  |                     |         |
| Aspirin                           | 74 (77.1)      | 221 (79.0)       | 126 (81.8)       | 146 (74.5)          | 0.41    |
| Clopidogrel                       | 42 (43.8)      | 137 (49.0)       | 77 (50.0)        | 84 (43.0)           | 0.436   |
| <sup>2</sup> blocker              | 58 (60.4)      | 170 (60.7)       | 103 (67.0)       | 127 (64.8)          | 0.538   |
| Calcium blocker                   | 8 (8.3)        | 42 (15.0)        | 23 (15.0)        | 26 (13.3)           | 0.395   |
| ACE inhibitor                     | 66 (68.8)      | 166 (59.3)       | 86 (55.8)        | 114 (58.2)          | 0.220   |
| ARB                               | 4 (4.2)        | 15 (5.4)         | 10 (6.5)         | 12 (6.1)            | 0.866   |
| Warfarin                          | 1 (1.0)        | 9 (3.2)          | 4 (2.6)          | 6 (3.1)             | 0.716   |
| Statins                           | 67 (69.8)      | 192 (68.6)       | 109 (70.8)       | 141 (72.0)          | 0.881   |
| Fibrate                           | 1 (1.0)        | 1 (0.4)          | 2 (1.3)          | 2 (1.0)             | 0.725   |
| <b>180 days after ACS</b>         |                |                  |                  |                     |         |
| Aspirin                           | 72 (83.7)      | 213 (83.5)       | 130 (90.0)       | 141 (80.1)          | 0.192   |
| Clopidogrel                       | 16 (18.6)      | 74 (29.0)        | 43 (29.5)        | 48 (27.3)           | 0.262   |
| <sup>2</sup> blocker              | 53 (61.6)      | 156 (61.2)       | 109 (74.7)       | 122 (69.3)          | 0.028   |
| Calcium blocker                   | 8 (9.3)        | 46 (18.0)        | 25 (17.1)        | 28 (16.0)           | 0.288   |
| ACE inhibitor                     | 61 (71.0)      | 148 (58.0)       | 87 (59.6)        | 104 (59.1)          | 0.192   |
| ARB                               | 8 (9.3)        | 26 (10.2)        | 26 (17.8)        | 20 (11.5)           | 0.108   |
| Warfarin                          | 4 (4.7)        | 10 (4.0)         | 9 (6.2)          | 6 (3.4)             | 0.648   |
| Statins                           | 65 (75.6)      | 196 (77.0)       | 125 (85.6)       | 135 (76.7)          | 0.135   |
| Fibrate                           | 0 (0)          | 3 (1.2)          | 2 (1.4)          | 3 (1.7)             | 0.694   |
| <b>1-year after ACS</b>           |                |                  |                  |                     |         |
| Aspirin                           | 63 (72.4)      | 203 (77.8)       | 113 (77.4)       | 136 (76.8)          | 0.776   |
| Clopidogrel                       | 12 (13.8)      | 48 (18.5)        | 29 (20.0)        | 32 (18.1)           | 0.703   |
| <sup>2</sup> blocker              | 51 (58.6)      | 155 (59.5)       | 96 (65.8)        | 113 (63.8)          | 0.513   |
| Calcium blocker                   | 8 (9.2)        | 37 (14.2)        | 23 (15.8)        | 30 (17.0)           | 0.389   |
| ACE inhibitor                     | 47 (54)        | 138 (53.0)       | 77 (52.7)        | 96 (54.2)           | 0.990   |
| ARB                               | 6 (7.0)        | 31 (12.0)        | 21 (14.5)        | 26 (14.7)           | 0.280   |
| Warfarin                          | 3 (3.4)        | 9 (3.4)          | 3 (2.1)          | 7 (4.0)             | 0.786   |
| Statins                           | 58 (66.7)      | 181 (69.3)       | 107 (73.3)       | 128 (72.3)          | 0.658   |
| Fibrate                           | 0 (0)          | 6 (2.3)          | 2 (1.5)          | 4 (2.3)             | 0.505   |

ACS: acute coronary syndrome

ACE: inhibitor: Angiotensin converting enzyme inhibitor

ARB: Angiotensin II converting enzyme inhibitor
